# Supplementary material
Source: publisher figshare collection journal article supplement (https://acs.figshare.com/ndownloader/files/4005844)

## **Supporting Information**

### **Conserved Walker A Cysteines 431 and 1074 in Human P-glycoprotein Are Accessible to Thiol-Specific Agents in the Apo and ADP-Vanadate Trapped Conformations**

Hong-May Sim, Jaya Bhatnagar, Eduardo E. Chufan, Khyati Kapoor and Suresh V. Ambudkar

**Table S1**

**Table S1: Cell surface expression and transport function of C431/C1074 and N611C/T1256C P-gp mutants in HeLa cells.**

| <b>Mutation(s)</b>  | <b>Cell surface expression</b> | <b>Transport Function (%)</b> |                     |                       |                     |
|---------------------|--------------------------------|-------------------------------|---------------------|-----------------------|---------------------|
|                     |                                | <b><u>Cal-AM</u></b>          | <b><u>Rh123</u></b> | <b><u>NBD-CsA</u></b> | <b><u>Dauno</u></b> |
| <b>C431/A1074C</b>  | 90-100                         | 95-100                        | 90-100              | 90-100                | 95-100              |
| <b>N611C/T1256C</b> | 40-50                          | 90-100                        | 90-100              | 90-100                | 90-100              |

### **Supplementary Table Legend**

The Bacmam baculovirus transduced HeLa cells were evaluated for cell surface P-gp expression using MRK-16 antibody and for transport function by following the accumulation of fluorescent substrates including rhodamine 123 (Rh123) (1.3  $\mu$ M), NBD-cyclosporine A (NBD-CsA) (0.5  $\mu$ M), daunorubicin (dauno) (0.5  $\mu$ M) and calcein-AM (cal-AM) (0.5  $\mu$ M) in the absence and presence of 1  $\mu$ M tariquidar. The cells were washed and analyzed by flow cytometry. The level of protein expression and transport activity in HeLa cells expressing the mutant P-gps was compared to that of the cysless-WT (taken as 100%). The values indicate the range of cell surface expression and steady-state accumulation from at least three independent experiments.

## Supplementary Figure Legends

### **Figure S1: Disulfide cross-linking of cysless WT and single cysteine mutant P-gps**

**with crosslinker M17M.** The DTT-free crude membranes of High-Five insect cells expressing cysless WT, C431 and C1074 were treated with and without M17M (200  $\mu$ M) for 15 min at 4 °C. The reactions were stopped by the addition of 5 X SDS-PAGE sample buffer without reducing agent ( $\beta$ ME) and samples were subjected to immunoblot analysis on SDS/PAGE (7% gel). The amount of protein loaded for cysless WT, C431 and C1074 are 0.1  $\mu$ g, 0.25  $\mu$ g and 1  $\mu$ g, respectively. An arrow shows the position of the uncrosslinked P-gp. Similar results were obtained in two independent experiments.

### **Figure S2: Treatment of N611C/T1256C in the apo state with crosslinker M17M.**

The DTT-free crude membranes of High-Five insect cells expressing N611C/T1256C were treated with 200 $\mu$ M of the homobifunctional disulfide cross-linker M17M for 15 min at 4 °C. The reactions were stopped by the addition of SDS sample buffer containing no reducing agent ( $\beta$ ME) and samples were subjected to immunoblot analysis on SDS/PAGE (7% gel). Arrows show the position of uncrosslinked P-gp in both apo and ADP-V<sub>i</sub> trapped conformations.

### **Figure S3: Inhibition of P-gp ATP hydrolysis by C431/C1074C in the presence of**

**vanadate (0.3 mM).** P-gp ATPase activity remained inhibited by vanadate in the closed conformation. In this experiment, 10  $\mu$ g of protein in the ADP-V<sub>i</sub> trapped conformation was reassessed for V<sub>i</sub>-sensitive P-gp mediated ATPase hydrolysis as described in Experimental Procedures. Figure is representative of two experiments with C431/C1074.

**Figure S4: Concentration-dependent effect of MTS-verapamil on cysless WT, single (C431 and C1074) and double (C431/C1074) mutant P-gp-mediated ATP hydrolysis.** Inhibition of cysless WT (●), single C431 (■) and C1074 (▲) and double C431/C1074 (▼) mutant P-gp ATPase activity by MTS-verapamil. Vanadate-sensitive P-gp mediated ATPase hydrolysis was measured as described in Experimental Procedures in the presence of increasing concentrations of MTS-verapamil (0 – 10  $\mu$ M). Data represent the mean values [Error bars = SD (n = 3)].

**Figure S5: Effect of MTS-verapamil and MTS-rhodamine on single C431 and C1074 and double C431/C1074 P-gp mediated ATP hydrolysis under different assay conditions.** Vanadate-sensitive P-gp mediated ATPase hydrolysis was measured as described in Experimental Procedures in the presence of MTS-verapamil (10  $\mu$ M) (A) and MTS-rhodamine (10  $\mu$ M) (B). Vanadate-sensitive P-gp mediated ATPase hydrolysis was carried out in the absence of DTT in the ATPase buffer (solid bars), with the addition of 4 mM DTT (bars with diagonal lines) and with the pre-incubation of 10 mM ATP and 20mM  $MgCl_2$  (bars with dots). Data represent the mean values of two experiments.

**Figure S6: Effect of fluorescein maleimide on cysless WT, single (N611C and T1256C) and double (N611C/T1256C) mutant P-gp mediated ATP hydrolysis.** (A) Inhibition of cysless WT (●), single N611C (▲) and T1256C (▼) and double N611C/T1256C (◆) mutant P-gp ATPase activity by FM. Vanadate-sensitive P-gp mediated ATPase hydrolysis was measured as described in Experimental Procedures in the presence of increasing concentrations of FM (0 – 25  $\mu$ M). (B) Inhibition of single

(N611C and T1256C) and double (N611C/T1256C) mutant P-gps ATPase activity when ATP is added prior to FM. Vanadate-sensitive P-gp mediated ATPase hydrolysis was measured as described in Experimental Procedures in the presence of increasing concentrations of FM (0 – 25  $\mu$ M). Data represent the mean values (Error bars showing  $\pm$  SD are shown for n = 3). The inhibition curves were generated by non-linear regression (one phase decay) using GraphPad Prism 5.

**Figure S7: Disulfide cross-linking of C431/C1074 mutant P-gp with crosslinker M17M in the presence of drug substrates.** The DTT-free crude membranes of High-Five insect cells expressing C431/C1074 were treated with cyclosporine A, QZ 59 SSS, actinomycin D at indicated concentrations for 5 mins at room temperature prior the addition of M17M (200 $\mu$ M) for 15 min at 4°C. The reactions were stopped by the addition of 5 X SDS-PAGE sample buffer without reducing agent ( $\beta$ ME) and samples were subjected to immunoblot analysis on SDS/PAGE (7% gel). Arrows show the positions of the crosslinked (X-linked) and un-crosslinked P-gp in the presence of various drug substrates as given above the immunoblot.

**Figure S1**

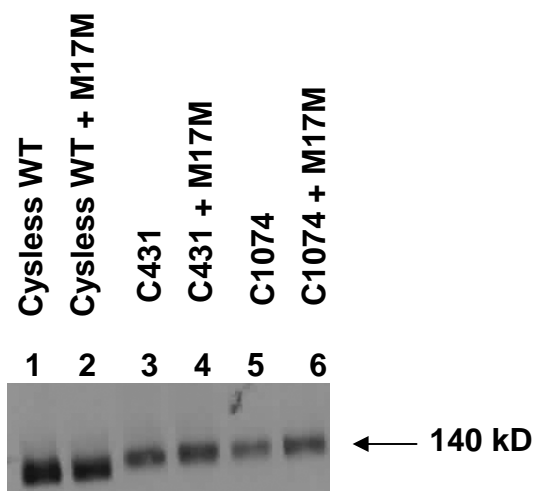

**Figure S2**

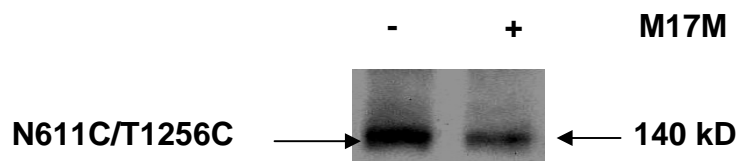

Figure S3

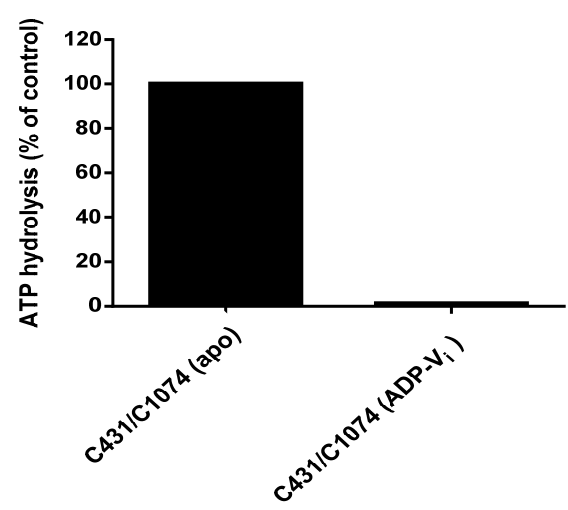

Figure S4

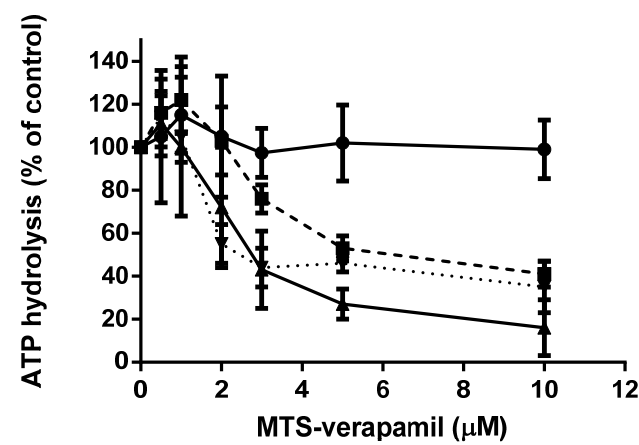

Figure S5

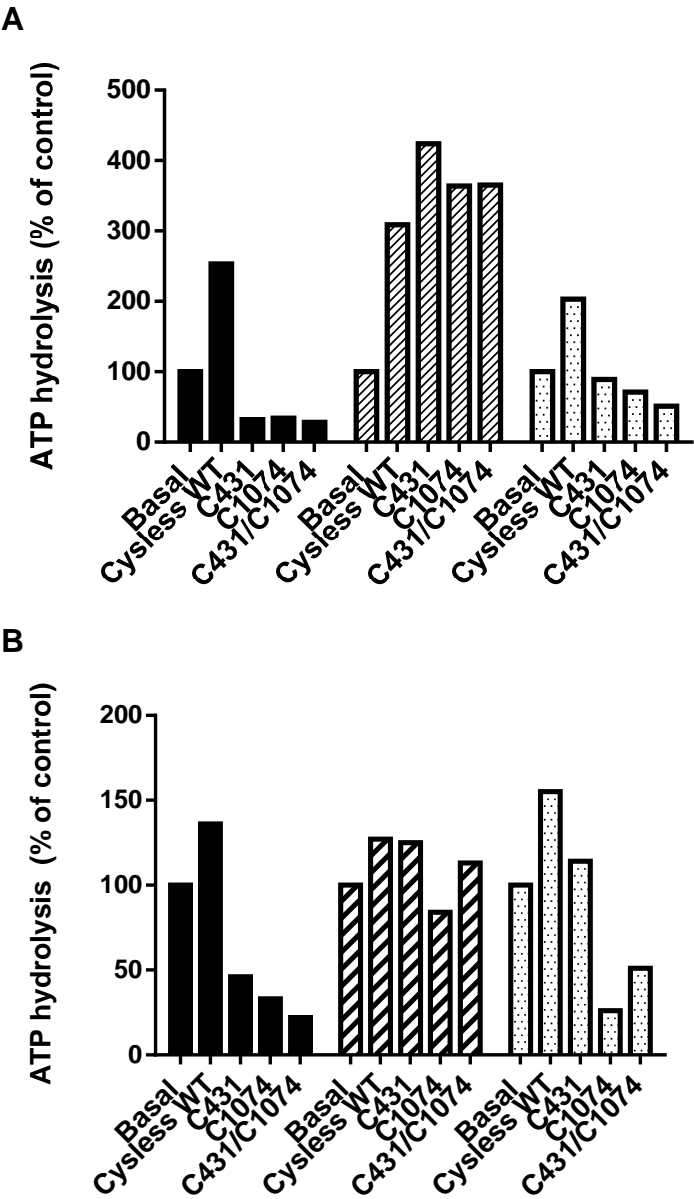

Figure S6

**A**

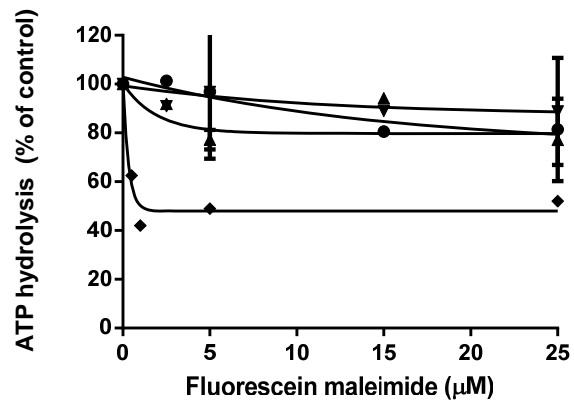

**B**

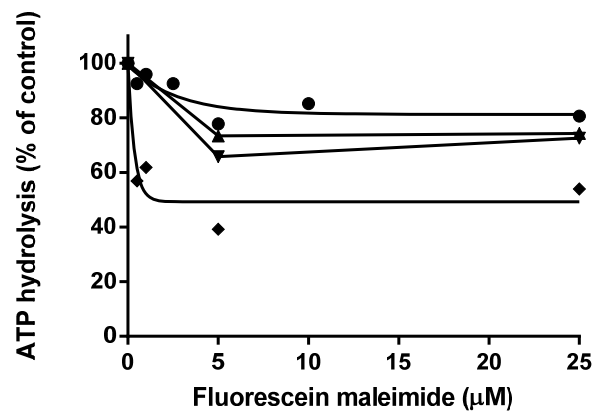

**Figure S7**

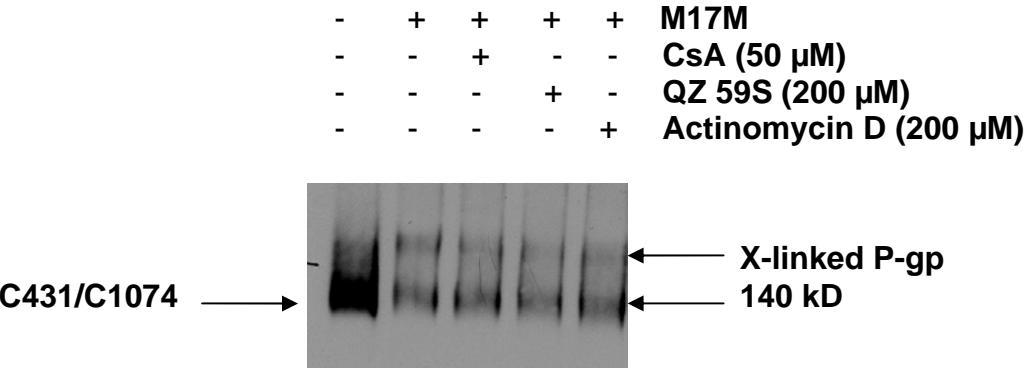

Supplement: Supplementary file 1 [file 4005844]
